# Supplementary material for: Metabolic Profiling and Comparative Proteomic Insight in Respect of Amidases during Iprodione Biodegradation
Source: MDPI journal article supplement (doi:10.3390/microorganisms11102367), 2023-09-22
Supplement: s1 [file s1]

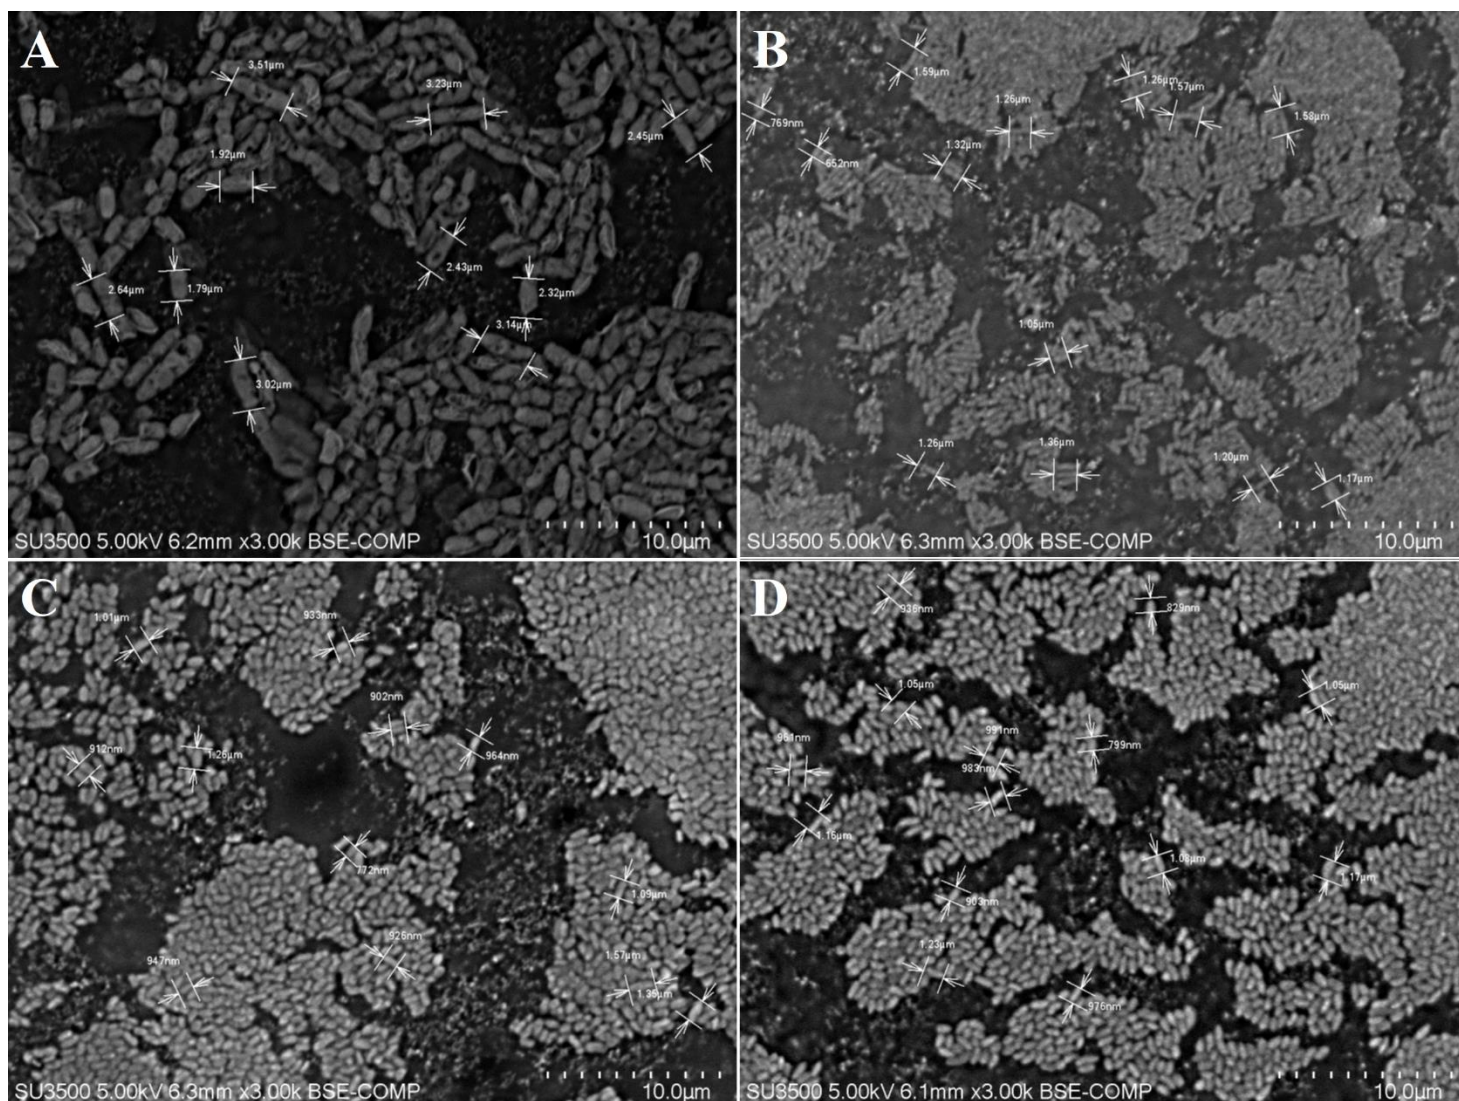

**Figure S1.**

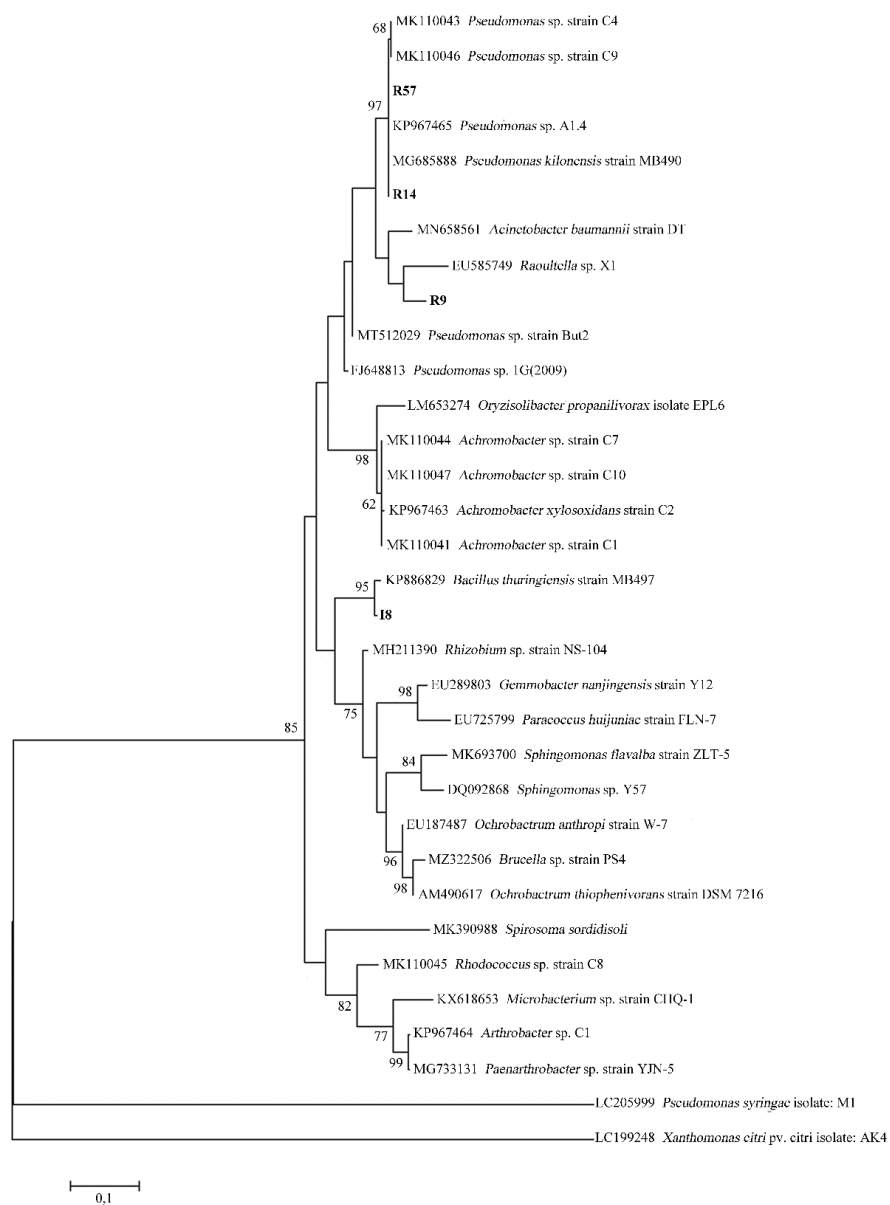

**Figure S2.**

**Table S1.**

| Strain  | IPR removal (%) | 3,5-DCA<br>(mg L <sup>-1</sup> ) |
|---------|-----------------|----------------------------------|
| N3      | 94.8            | 0.180 ± 0.040                    |
| I1      | 55.2            | 0.254 ± 0.030                    |
| I2      | 59.5            | 0.175 ± 0.010                    |
| I8      | 97.1            | 0.231 ± 0.030                    |
| I12     | 32              | 0.176 ± 0.050                    |
| M6      | 94.1            | 0.194 ± 0.010                    |
| M12     | 93.9            | 0.043 ± 0.010                    |
| R1      | 33.6            | 0.109 ± 0.040                    |
| R5      | 94.8            | 0.93 ± 0.050                     |
| R9      | 97.1            | 0.253 ± 0.010                    |
| R14     | 96.7            | 0.257 ± 0.040                    |
| R44     | 83.5            | 0.129 ± 0.070                    |
| R57     | 96.8            | 0.199 ± 0.090                    |
| C1      | 97.3            | 0.195 ± 0.050                    |
| C9      | 97.3            | 0.141 ± 0.020                    |
| Control | 6.0             | ≤0.076 ± 0.000                   |

The average values of two replicates are presented (n = 2); 3,5- DCA (mg L<sup>-1</sup>): production of metabolite 3,5-dichloroaniline.

Table S2.

| Strain | Biochemical test |           |        |          |            | Morphology |           |        |
|--------|------------------|-----------|--------|----------|------------|------------|-----------|--------|
|        | Amylase          | Cellulase | Lipase | Protease | Gelatinase | Gram       | Cell form | Colony |
| I8     | +                | +         | +      | +        | +          | +          | Bacillus  | Pink   |
| R9     | -                | -         | -      | +        | +          | -          | Bacillus  | Yellow |
| R14    | -                | -         | -      | -        | -          | -          | Bacillus  | White  |
| R57    | -                | -         | -      | +        | +          | -          | Bacillus  | White  |

+ : Positive reaction, - : Negative reaction

Table S3.

| Enzyme                             | Response of strains |    |     |     |
|------------------------------------|---------------------|----|-----|-----|
|                                    | I8                  | R9 | R14 | R57 |
| Control                            | -                   | -  | -   | -   |
| Alkaline phosphatase               | +                   | +  | -   | +   |
| Esterase (C4)                      | +                   | +  | +   | +   |
| Esterase lipase (C8)               | +                   | +  | +   | +   |
| Lipase (C14)                       | -                   | +  | -   | -   |
| Leucine arylamidase                | +                   | +  | +   | +   |
| Valine arylamidase                 | -                   | +  | +   | +   |
| Cystine arylamidase                | +                   | +  | -   | -   |
| Trypsin                            | -                   | +  | +   | -   |
| $\alpha$ - Chymotrypsin            | +                   | -  | -   | +   |
| Acid phosphatase                   | +                   | +  | +   | +   |
| Naphthol-AS-BI-phosphohydrolase    | +                   | +  | +   | +   |
| $\alpha$ -Galactosidase            | +                   | -  | -   | -   |
| $\beta$ - Galactosidase            | +                   | -  | -   | -   |
| $\beta$ -Glucuronidase             | -                   | -  | -   | -   |
| $\alpha$ - Glucosidase             | +                   | +  | -   | -   |
| $\beta$ - Glucosidase              | -                   | +  | -   | -   |
| N-acetyl- $\beta$ -Glucosaminidase | -                   | -  | -   | -   |
| $\alpha$ - Mannosidase             | -                   | -  | -   | -   |
| $\alpha$ - Fucosidase              | -                   | -  | -   | -   |

+ : Positive reaction, - : Negative reaction

**Table S4.**

| Strain | Most closely related strain<br>(NCBI Accession N <sup>o</sup> ) <sup>a</sup> | Identity (%) | Accession N <sup>o</sup> |
|--------|------------------------------------------------------------------------------|--------------|--------------------------|
| I8     | <i>Priestia aryabhattai</i> strain B8W22 (NR_115953.1)                       | 99.2         | OM993327                 |
| R9     | <i>Stenotrophomonas rhizophila</i> strain IHBB 9245 (KU921558.1)             | 97.9         | OQ174722                 |
| R14    | <i>Pseudomonas vancouverensis</i> strain DhA-51(NR_041953.1)                 | 99.6         | OM993328                 |
| R57    | <i>Pseudomonas vancouverensis</i> strain LMG 20222 (NZ_LT629803)             | 99.6         | OM993329                 |

(a) Based on partial sequencing of 16S rRNA gene and comparison with those present in GenBank database from National Center for Biotechnology Information (NCBI) by using BLAST.

Table S5.

| Up-regulated                                        |    | Down-regulated                                   |    | IPR Treatment*                                      |    |
|-----------------------------------------------------|----|--------------------------------------------------|----|-----------------------------------------------------|----|
| M. Pathway**                                        | N° | M. Pathway**                                     | N° | M. Pathway**                                        | N° |
| Total metabolic pathways                            | 17 | Total metabolic pathways                         | 11 | Total metabolic pathways                            | 37 |
| Biosynthesis of secondary metabolites               | 8  | Microbial metabolism in diverse environments     | 4  | Biosynthesis of secondary metabolites               | 18 |
| Ribosome                                            | 7  | Biosynthesis of cofactors                        | 3  | Microbial metabolism in diverse environments        | 13 |
| Biosynthesis of amino acids                         | 5  | Biosynthesis of secondary metabolites            | 3  | Biosynthesis of amino acids                         | 10 |
| Microbial metabolism in diverse environments        | 5  | Carbon metabolism                                | 2  | ABC transporters                                    | 8  |
| Glycine, serine and threonine metabolism            | 3  | Pyruvate metabolism                              | 2  | Carbon metabolism                                   | 8  |
| Oxidative phosphorylation                           | 3  | Two-component system                             | 1  | Propanoate metabolism                               | 6  |
| Biosynthesis of nucleotide sugars                   | 2  | Oxocarboxylic acid metabolism                    | 1  | Valine, leucine and isoleucine degradation          | 5  |
| Carbon metabolism                                   | 2  | Pantothenate and CoA biosynthesis                | 1  | Pyruvate metabolism                                 | 5  |
| Cysteine and methionine metabolism                  | 2  | RNA degradation                                  | 1  | Quorum sensing                                      | 4  |
| Lipopolysaccharide biosynthesis                     | 2  | Cationic antimicrobial peptide (CAMP) resistance | 1  | Nucleotide metabolism                               | 3  |
| Biosynthesis of cofactors                           | 2  | Arginine biosynthesis                            | 1  | Phenylalanine, tyrosine and tryptophan biosynthesis | 3  |
| Pyruvate metabolism                                 | 2  | Glutathione metabolism                           | 1  | Glycolysis / Gluconeogenesis                        | 3  |
| Bacterial secretion system                          | 2  | beta-Lactam resistance                           | 1  | Glutathione metabolism                              | 3  |
| ABC transporters                                    | 1  | Dioxin degradation                               | 1  | Histidine metabolism                                | 3  |
| Pyrimidine metabolism                               | 1  | beta-Alanine metabolism                          | 1  | Methane metabolism                                  | 2  |
| Phenylalanine, tyrosine and tryptophan biosynthesis | 1  | Fatty acid biosynthesis                          | 1  | 2-Oxocarboxylic acid metabolism                     | 2  |
| Naphthalene degradation                             | 1  | Degradation of aromatic compounds                | 1  | Arginine and proline metabolism                     | 2  |
| Tyrosine metabolism                                 | 1  | Biosynthesis of amino acids                      | 1  | Fatty acid metabolism                               | 2  |
| Biotin metabolism                                   | 1  | Butanoate metabolism                             | 1  | Valine, leucine and isoleucine biosynthesis         | 2  |
| Fatty acid metabolism                               | 1  | Ribosome                                         | 1  | Glyoxylate and dicarboxylate metabolism             | 2  |
| Glyoxylate and dicarboxylate metabolism             | 1  | Propanoate metabolism                            | 1  | Aminoacyl-tRNA biosynthesis                         | 2  |
| DNA replication                                     | 1  | Biotin metabolism                                | 1  | Phenylalanine metabolism                            | 2  |
| Galactose metabolism                                | 1  | Xylene degradation                               | 1  | Alanine, aspartate and glutamate metabolism         | 2  |
| Histidine metabolism                                | 1  | Pyrimidine metabolism                            | 1  | Pantothenate and CoA biosynthesis                   | 2  |
| Degradation of aromatic compounds                   | 1  | ABC transporters                                 | 1  | Ribosome                                            | 2  |
| Chloroalkane and chloroalkene degradation           | 1  | Purine metabolism                                | 1  | Purine metabolism                                   | 2  |
| Citrate cycle (TCA cycle)                           | 1  | One carbon pool by folate                        | 1  | Fatty acid biosynthesis                             | 2  |

|                                             |   |                                              |   |                                          |   |
|---------------------------------------------|---|----------------------------------------------|---|------------------------------------------|---|
| Lysine biosynthesis                         | 1 | Benzoate degradation                         | 1 | Flagellar assembly                       | 1 |
| Fatty acid biosynthesis                     | 1 | Fatty acid metabolism                        | 1 | Pyrimidine metabolism                    | 1 |
| Oxocarboxylic acid metabolism               | 1 | Alanine, aspartate, and glutamate metabolism | 1 | Acarbose and validamycin biosynthesis    | 1 |
| Phenylalanine metabolism                    | 1 | Nucleotide metabolism                        | 1 | Cysteine and methionine metabolism       | 1 |
| Homologous recombination                    | 1 | Oxidative phosphorylation                    | 1 | Benzoate degradation                     | 1 |
| Glycolysis / Gluconeogenesis                | 1 |                                              |   | Inositol phosphate metabolism            | 1 |
| Fatty acid degradation                      | 1 |                                              |   | Monobactam biosynthesis                  | 1 |
| Arginine biosynthesis                       | 1 |                                              |   | Novobiocin biosynthesis                  | 1 |
| Protein export                              | 1 |                                              |   | RNA degradation                          | 1 |
| Mismatch repair                             | 1 |                                              |   | Streptomycin biosynthesis                | 1 |
| Valine, leucine and isoleucine degradations | 1 |                                              |   | Lysine biosynthesis                      | 1 |
| Nucleotide metabolism                       | 1 |                                              |   | Biosynthesis of nucleotide sugars        | 1 |
| Quorum sensing                              | 1 |                                              |   | Tyrosine metabolism                      | 1 |
| Purine metabolism                           | 1 |                                              |   | Bacterial chemotaxis                     | 1 |
| Peptidoglycan biosynthesis                  | 1 |                                              |   | Two-component system                     | 1 |
| Amino sugar and nucleotide sugar metabolism | 1 |                                              |   | Lipopolysaccharide biosynthesis          | 1 |
| Methane metabolism                          | 1 |                                              |   | Taurine and hypotaurine metabolism       | 1 |
| Valine, leucine and isoleucine biosynthesis | 1 |                                              |   | Degradation of aromatic compounds        | 1 |
| Seleno compound metabolism                  | 1 |                                              |   | beta-Alanine metabolism                  | 1 |
|                                             |   |                                              |   | Glycine, serine and threonine metabolism | 1 |
|                                             |   |                                              |   | Arginine biosynthesis                    | 1 |
|                                             |   |                                              |   | Tryptophan metabolism                    | 1 |
|                                             |   |                                              |   | Butanoate metabolism                     | 1 |
|                                             |   |                                              |   | C5-Branched dibasic acid metabolism      | 1 |
|                                             |   |                                              |   | Citrate cycle (TCA cycle)                | 1 |
|                                             |   |                                              |   | Polyketide sugar unit biosynthesis       | 1 |
|                                             |   |                                              |   | Nitrogen metabolism                      | 1 |
|                                             |   |                                              |   | O-Antigen nucleotide sugar biosynthesis  | 1 |
|                                             |   |                                              |   | Pentose phosphate pathway                | 1 |

IPR Treatment\*: Solely expressed on IPR Treatment; M. Pathway\*\*: Metabolic pathways by KEEG; N°: number of involved proteins
